# Supplementary material for: Subducted organic matter buffered by marine carbonate rules the carbon isotopic signature of arc emissions
Source: Springer Nature journal article supplement (doi:10.1038/s41467-022-30421-5), 2022-05-25
Supplement: MOESM1 [file 41467_2022_30421_MOESM1_ESM.pdf]

## Supplementary Figure 1

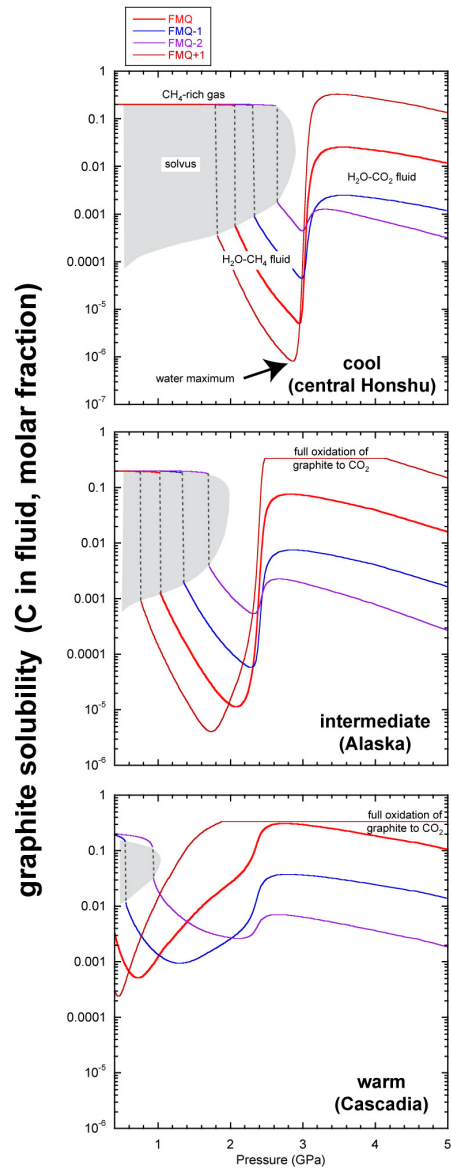

Graphite solubility (molar fraction C) in aqueous fluids buffered at different  $\Delta\text{FMQ}$  conditions. Calculations are performed by conventional thermodynamic modelling of graphite-saturated COH fluids (*1*) for model cool, intermediate and warm subduction regimes. Regardless of geothermal gradient, the carbon content initially decreases with depth to a minimum, then increases over a narrow depth range and remains nearly constant to greater depth. The solubility pattern tracks a transition from  $\text{CH}_4$  dominated fluids at shallow depths, and  $\text{CO}_2$  dominated fluids at greater depth; the minima occur where the bulk  $X\text{O} = 1/3$  ( $\text{H}_2\text{O}$  stoichiometry; "water maximum" conditions). Shallow fluid compositions intersect the  $\text{H}_2\text{O}$ – $\text{CH}_4$  miscibility gap.

## Supplementary Figure 2

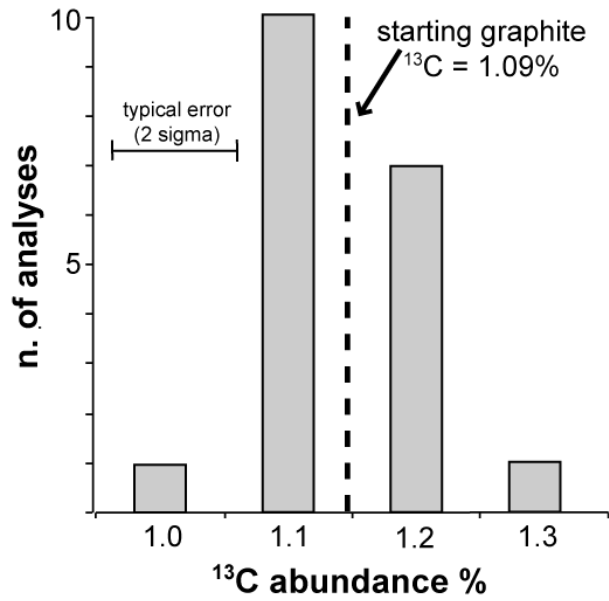

Histogram of the post-quench isotopic composition of graphite. Analyses are performed by means of NanoSIMS and LA-ICP-MS. Dashed line: isotopic composition of the starting graphite (EA-IRMS). Error bar represents typical uncertainty of LA-ICP-MS analyses.

### Supplementary Figure 3

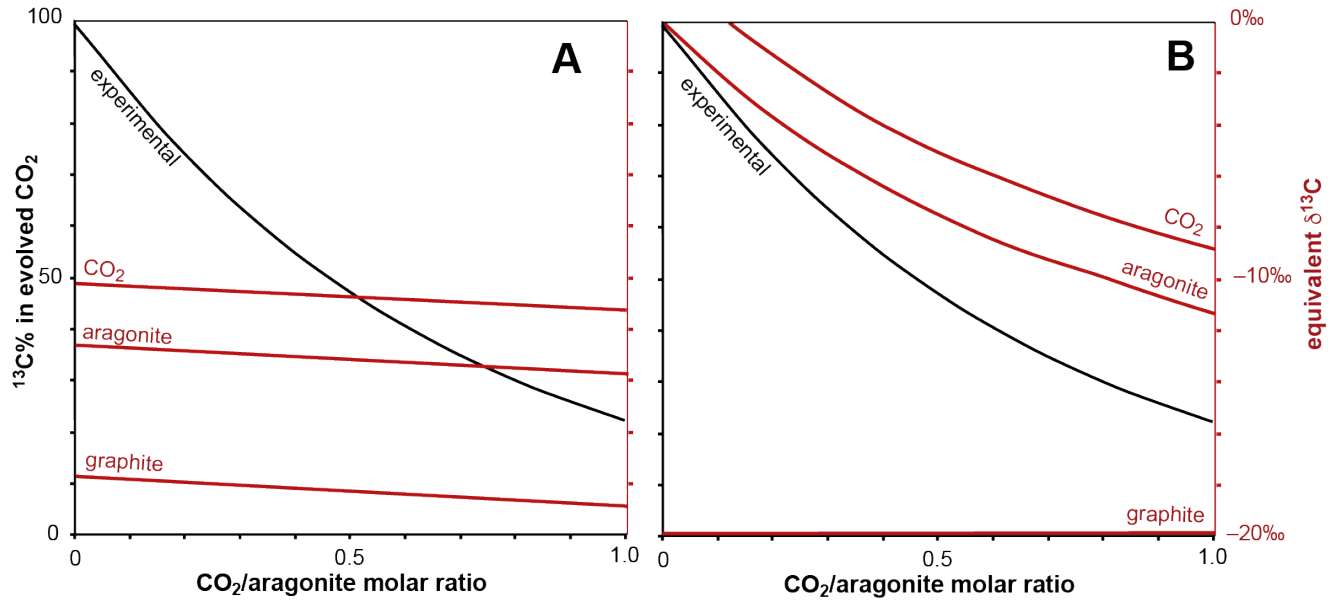

Comparison of the experimental data fit (solid black lines) with conventional isotopic modelling (solid red lines). Modelling is performed assuming  $T = 700^\circ\text{C}$ , room pressure and that  $\delta^{13}\text{C} = 0\text{‰}$  and  $-20\text{‰}$  are equivalent to  $^{13}\text{C} = 100\%$  and  $0\%$ , respectively.  $\text{CO}_2/\text{CaCO}_3$  molar ratio is displayed in the  $x$ -axis. (A) In the conventional isotopic model,  $\text{CO}_2$ , aragonite and graphite can all freely exchange isotopes and reach mass-balance equilibrium. The experimental conditions are replicated with  $30\ \mu\text{mol}$  aragonite and progressive oxidation of  $166.5\ \mu\text{mol}$  of graphite to  $\text{CO}_2$  from  $0\ \mu\text{mol}$  ( $x = 0$ ) to  $30\ \mu\text{mol}$  ( $x = 1$ ); (B) graphite is treated as a chemically reactive phase, oxidizing to  $\text{CO}_2$ , but as an isotopically inert phase; in this case only aragonite and  $\text{CO}_2$  can freely exchange isotopes to reach mass-balance equilibrium.

Supplementary Figure 4

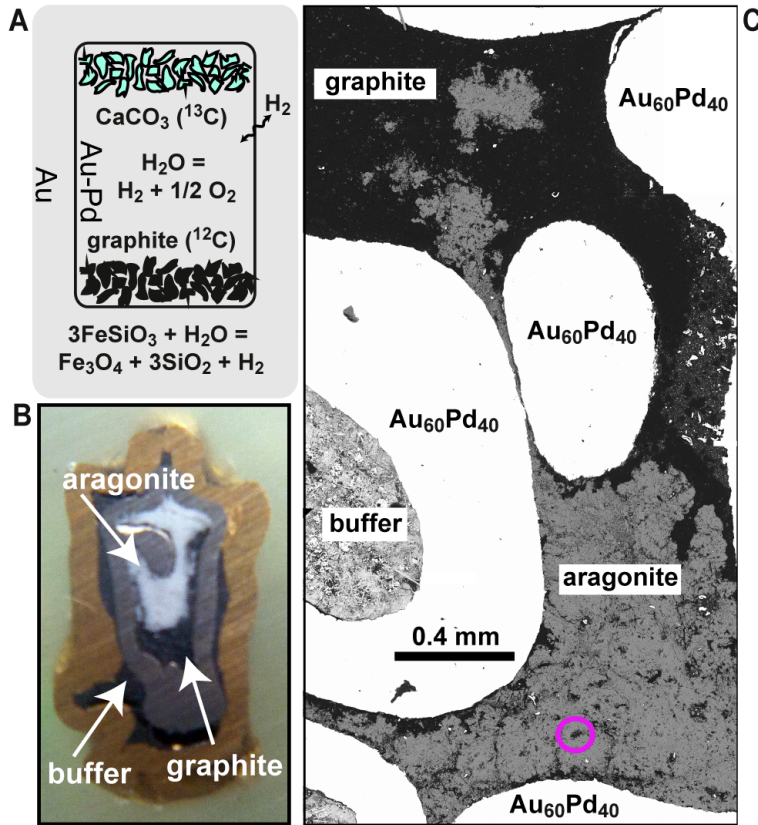

Details of the experimental design. (A) Outline of the typical experimental capsule; in the inner Au–Pd capsule, permeable to  $\text{H}_2$ , synthetic graphite and labelled  $\text{Ca}^{13}\text{CO}_3$  interact with excess ultrapure water (~20 wt%). In the outer Au capsule, the buffering assemblage ferrosilite + magnetite + coesite constrains the hydrogen fugacity. The expected  $f\text{O}_2$  in the inner capsule is  $\Delta\text{FMQ} = -0.16$ . (B) Example of post-quench double capsule (sample COH98) containing the assemblage graphite + aragonite (checked by micro-Raman spectroscopy). Outer gold capsule diameter: 4.5 mm; natural light photograph. (c) Back-scattered electron image of the inner Au–Pd capsule of sample COH92 after NanoSIMS analysis. Size of a typical pit in aragonite is shown within the magenta circle.

**Supplementary Figure 5**

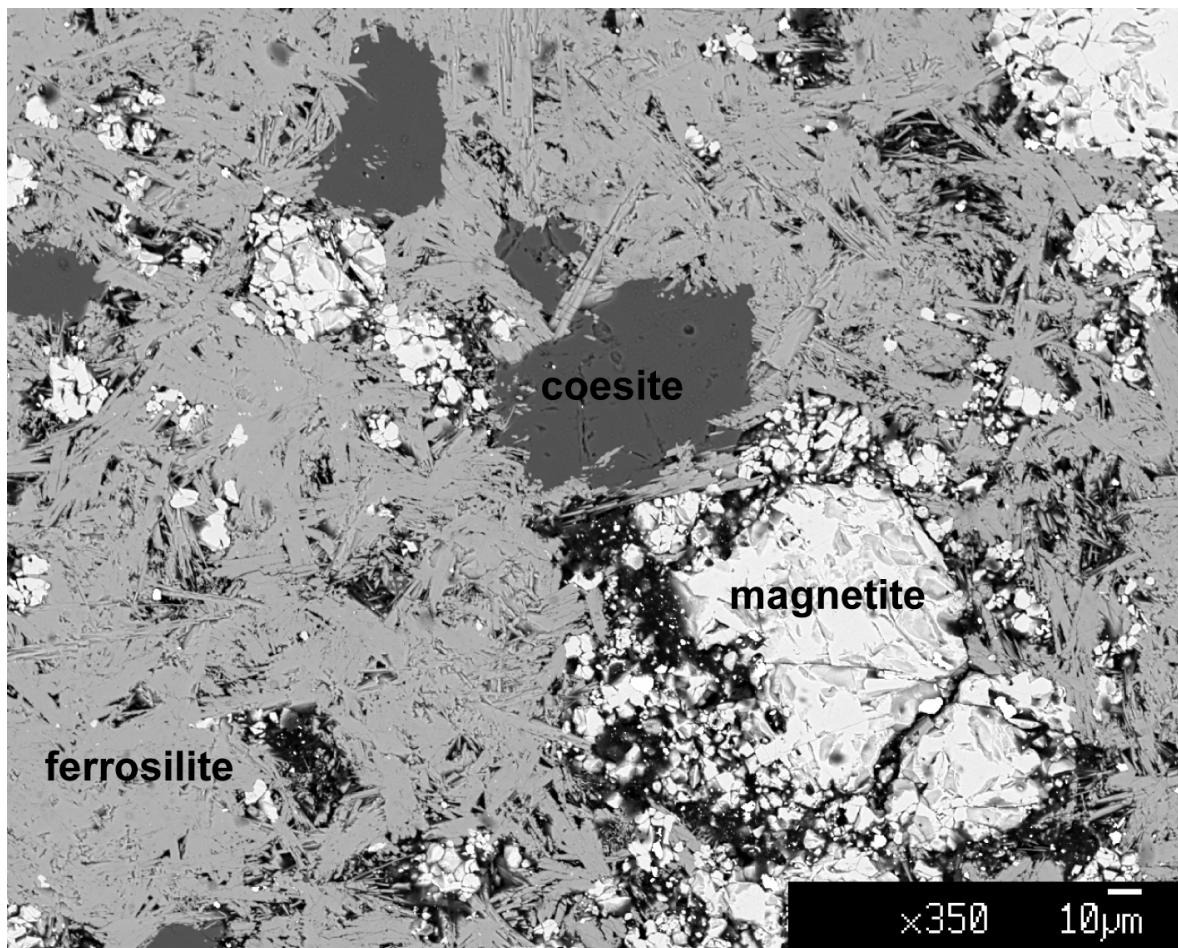

Back-scattered electron image of the buffering assemblage in the outer capsule. The occurrence of ferrosilite + magnetite + coesite is confirmed by electron-microprobe analysis and micro-Raman spectroscopy.

**Supplementary Table 1.** Run table of the experiments performed at 3 GPa–700°C and analyses of volatiles and of bulk after-run aragonite.

**Supplementary Table 2.** Molality of CO<sub>2</sub> in analyzed fluids.

**Supplementary Table 3.** Deep Earth Water thermodynamic modelling of aqueous fluids at the investigated experimental conditions.

**Supplementary Table 4.** Conventional thermodynamic modelling of graphite-saturated fluids (C–O–H system) at the investigated experimental conditions.

**Supplementary Table 5.** Nano-SIMS analyses of graphite and aragonite in sample COH92.

**Supplementary Table 6:** LA-ICP-MS analyses of graphite and aragonite.

**Supplementary Table 7:** Parameters of Equation 6.

**Supplementary Table 8:** Thermal decomposition of oxalic acid di-hydrate and retrieval of the mass-bias QMS correction.

**Supplementary Table 9:** LA-ICP-MS analysis of standard carbonates.

**Supplementary Table 10:** Bulk analyses of labeled reagent and standard carbonates.

Supplementary Table 1: Run table of the experiments performed at 3 GPa–700°C and analyses of volatiles and of bulk after-run aragonite.

| run    | runtime<br>(h) | buffer<br>(double capsule) | starting materials                                                                              | Ca- <sup>13</sup> CO <sub>3</sub><br>μmol | graphite<br>μmol | Ca- <sup>13</sup> CO <sub>3</sub> /<br>graphite | run products (+fluid) | total volatiles<br>μmol | H <sub>2</sub> O | CO <sub>2</sub> | CH <sub>4</sub> | CO <sub>2</sub> mol% <sup>13</sup> C | X CO <sub>2</sub> <sup>a</sup> | bulk aragonite<br>mol% <sup>13</sup> C <sup>c</sup> | CO <sub>2</sub> /<br>Ca <sup>13</sup> CO <sub>3</sub> |
|--------|----------------|----------------------------|-------------------------------------------------------------------------------------------------|-------------------------------------------|------------------|-------------------------------------------------|-----------------------|-------------------------|------------------|-----------------|-----------------|--------------------------------------|--------------------------------|-----------------------------------------------------|-------------------------------------------------------|
| COH89  | 72             | fs+mt+coe                  | Ca <sup>13</sup> CO <sub>3</sub> + H <sub>2</sub> O                                             | 55.6                                      | -                | -                                               | arag ± cc             | 62.95                   | 59.50            | 0.16            | 0.07            | 27.1                                 | 0.001 <sup>b</sup>             | n.m.                                                | 0.003                                                 |
| COH99  | 72             | Re+ReO <sub>2</sub>        | Ca <sup>13</sup> CO <sub>3</sub> + H <sub>2</sub> O                                             | 52.6                                      | -                | -                                               | arag ± cc             | 36.32                   | 31.30            | 0.14            | 0.05            | 42.8                                 | 0.002 <sup>b</sup>             | n.m.                                                | 0.003                                                 |
| COH82  | 72             | fs+mt+coe                  | Ca <sup>13</sup> CO <sub>3</sub> + Cl-bear. Zr(OH) <sub>4</sub> <sup>d</sup> + H <sub>2</sub> O | 91.0                                      | -                | -                                               | arag + bdy ± cc       | 57.84                   | 50.31            | 2.32            | 0.05            | 84.9                                 | 0.038 <sup>b,d</sup>           | n.m.                                                | 0.025                                                 |
| COH83  | 72             | fs+mt+coe                  | Ca <sup>13</sup> CO <sub>3</sub> + Cl-bear. Zr(OH) <sub>4</sub> <sup>e</sup> + H <sub>2</sub> O | 52.4                                      | -                | -                                               | arag + bdy ± cc       | 22.69                   | 18.87            | 0.97            | 0.02            | 86.4                                 | 0.042 <sup>b,d</sup>           | n.m.                                                | 0.018                                                 |
| COH88  | 72             | fs+mt+coe                  | graphite + H <sub>2</sub> O                                                                     | -                                         | 328.8            | -                                               | graph                 | 14.93                   | 6.58             | 4.81            | 0.05            | 1.43                                 | 0.422                          | -                                                   | -                                                     |
| COH96  | 240            | fs+mt+coe                  | graphite + H <sub>2</sub> O                                                                     | -                                         | 331.3            | -                                               | graph                 | 20.72                   | 10.37            | 5.32            | 0.00            | 1.11                                 | 0.339                          | -                                                   | -                                                     |
| COH170 | 0.24           | fs+mt+coe                  | graphite + Ca <sup>13</sup> CO <sub>3</sub> + H <sub>2</sub> O                                  | 10.2                                      | 219.8            | 0.044                                           | graph + arag ± cc     | 30.29                   | 26.21            | 0.70            | 0.10            | 62.8                                 | 0.026                          | 96.1                                                | 0.069                                                 |
| COH186 | 0.24           | fs+mt+coe                  | graphite + Ca <sup>13</sup> CO <sub>3</sub> + H <sub>2</sub> O                                  | 29.6                                      | 194.0            | 0.132                                           | graph + arag ± cc     | 14.35                   | 11.69            | 0.34            | 0.00            | 52.9                                 | 0.028                          | 97.2                                                | 0.012                                                 |
| COH106 | 2.4            | fs+mt+coe                  | graphite + Ca <sup>13</sup> CO <sub>3</sub> + H <sub>2</sub> O                                  | 24.9                                      | 183.2            | 0.120                                           | graph + arag ± cc     | 21.10                   | 18.06            | 0.71            | 0.01            | 80.5                                 | 0.038                          | 95.8                                                | 0.028                                                 |
| COH98  | 24             | fs+mt+coe                  | graphite + Ca <sup>13</sup> CO <sub>3</sub> + H <sub>2</sub> O                                  | 29.5                                      | 174.0            | 0.145                                           | graph + arag ± cc     | 22.94                   | 17.88            | 2.51            | 0.02            | 88.4                                 | 0.123                          | 88.1                                                | 0.085                                                 |
| COH92  | 72             | fs+mt+coe                  | graphite + Ca <sup>13</sup> CO <sub>3</sub> + H <sub>2</sub> O                                  | 28.3                                      | 188.1            | 0.131                                           | graph + arag ± cc     | 28.44                   | 21.28            | 3.93            | 0.02            | 81.7                                 | 0.156                          | 89                                                  | 0.139                                                 |
| COH97  | 240            | fs+mt+coe                  | graphite + Ca <sup>13</sup> CO <sub>3</sub> + H <sub>2</sub> O                                  | 29.2                                      | 190.6            | 0.133                                           | graph + arag ± cc     | 26.53                   | 18.37            | 3.66            | b.d.l.          | 82.2                                 | 0.166                          | 82.9                                                | 0.125                                                 |
| COH171 | 0.24           | fs+mt+coe                  | Ca <sup>13</sup> CO <sub>3</sub> + OAD (0.3 mg)                                                 | 37.8                                      | -                | -                                               | arag ± cc             | 7.56                    | 1.74             | 3.47            | 0.00            | 84.1                                 | 0.666                          | 83.8                                                | 0.092                                                 |
| COH178 | 72             | fs+mt+coe                  | Ca <sup>13</sup> CO <sub>3</sub> + OAD (0.3 mg)                                                 | 40.2                                      | -                | -                                               | arag ± cc             | 11.07                   | 3.89             | 5.27            | 0.04            | 79.9                                 | 0.575                          | 80.8                                                | 0.131                                                 |
| COH184 | 72             | fs+mt+coe                  | Ca <sup>13</sup> CO <sub>3</sub> + OAD (0.3 mg)                                                 | 29.9                                      | -                | -                                               | arag ± cc             | 11.02                   | 4.48             | 2.82            | 0.00            | 84.3                                 | 0.386                          | 86.7                                                | 0.094                                                 |
| COH185 | 72             | fs+mt+coe                  | Ca <sup>13</sup> CO <sub>3</sub> + OAD (2 mg)                                                   | 29.8                                      | -                | -                                               | arag ± cc             | 41.52                   | 17.08            | 17.99           | 0.05            | 54.7                                 | 0.513                          | 55.3                                                | 0.604                                                 |

a: X CO<sub>2</sub> = CO<sub>2</sub> / (H<sub>2</sub>O + CO<sub>2</sub>)<sub>molar</sub>

b: considering only <sup>13</sup>C

c: total decomposition by HCl + QMS analysis of evolved CO<sub>2</sub>

d: chlorine in Zr(OH)<sub>4</sub> = 0.6 wt%; calculated final fluid Cl concentration = 0.89 mol Cl/kgH<sub>2</sub>O

e: chlorine in Zr(OH)<sub>4</sub> = 0.6 wt%; calculated final fluid Cl concentration = 0.54 mol Cl/kgH<sub>2</sub>O

n.m.: not measured

b.d.l.: below detection limit

fs: ferrosilite; mt: magnetite; coe:coesite; arag: aragonite; cc: calcite; graph: graphite; bdy: baddeleyite; OAD: oxalic acid di-hydrate

**Supplementary Table 2: Molality of CO<sub>2</sub> in analyzed fluids.**

| Run    | mol <sup>13</sup> CO <sub>2</sub> / | mol CO <sub>2(TOT)</sub> / |
|--------|-------------------------------------|----------------------------|
|        | kgH <sub>2</sub> O                  | kgH <sub>2</sub> O         |
| COH89  | 0.041                               | -                          |
| COH99  | 0.108                               | -                          |
| COH82  | 2.169                               | -                          |
| COH83  | 2.460                               | -                          |
| COH88  | -                                   | 39.99                      |
| COH96  | -                                   | 28.16                      |
| COH170 | -                                   | 1.482                      |
| COH186 | -                                   | 1.617                      |
| COH106 | -                                   | 2.167                      |
| COH98  | -                                   | 7.794                      |
| COH92  | -                                   | 10.26                      |
| COH97  | -                                   | 11.05                      |
| COH171 | -                                   | 110.6                      |
| COH178 | -                                   | 75.25                      |
| COH184 | -                                   | 34.86                      |
| COH185 | -                                   | 58.46                      |

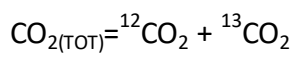



Supplementary Table 3: Deep Earth Water thermodynamic modelling of aqueous fluids at the investigated experimental conditions.

| saturated phases                                                                  | aragonite | graphite                             | graphite+aragonite |                                      |           |
|-----------------------------------------------------------------------------------|-----------|--------------------------------------|--------------------|--------------------------------------|-----------|
| P (GPa)                                                                           | 3         | 3                                    | 3                  |                                      |           |
| T (°C)                                                                            | 700       | 700                                  | 700                |                                      |           |
| log( <i>f</i> H <sub>2</sub> /1 bar)                                              | 2.195     | 2.195                                | 2.195              |                                      |           |
| pH                                                                                | 5.090     | 2.210                                | 4.200              |                                      |           |
| X CO <sub>2</sub> =[CO <sub>2(AQ)</sub> /(H <sub>2</sub> O+CO <sub>2(AQ)</sub> )] | 0.0002    | 0.305                                | 0.284              |                                      |           |
| C bulk solubility (molality)                                                      | 0.1205    | 24.40                                | 24.05              |                                      |           |
| <i>predicted species (decreasing molality)</i>                                    |           |                                      |                    |                                      |           |
| OH-                                                                               | 1.12E-01  | CO <sub>2</sub> (AQ)                 | 2.44E+01           | CO <sub>2</sub> (AQ)                 | 2.20E+01  |
| CA(HCO <sub>3</sub> ) <sup>+</sup>                                                | 8.94E-02  | H <sup>+</sup>                       | 6.78E-03           | CA(HCO <sub>3</sub> ) <sup>+</sup>   | 8.90E-01  |
| CA(OH) <sup>+</sup>                                                               | 1.37E-02  | CO(AQ)                               | 5.67E-03           | HCO <sub>3</sub> <sup>-</sup>        | 8.07E-01  |
| CA(HCOO) <sup>+</sup>                                                             | 1.10E-02  | HCO <sub>3</sub> <sup>-</sup>        | 5.39E-03           | HCOO <sup>-</sup>                    | 2.01E-01  |
| CO <sub>2</sub> (AQ)                                                              | 8.80E-03  | HCOOH                                | 4.15E-03           | CA(HCOO) <sup>+</sup>                | 1.49E-01  |
| HCO <sub>3</sub> <sup>-</sup>                                                     | 6.24E-03  | HCOO <sup>-</sup>                    | 1.32E-03           | OH-                                  | 1.40E-02  |
| CACO <sub>3</sub> (AQ)                                                            | 3.50E-03  | CH <sub>4</sub> (AQ)                 | 3.19E-04           | CO <sub>3</sub> <sup>--</sup>        | 8.95E-03  |
| CA <sup>++</sup>                                                                  | 2.97E-03  | H <sub>2</sub> (AQ)                  | 1.77E-04           | CO(AQ)                               | 5.57E-03  |
| HCOO <sup>-</sup>                                                                 | 1.15E-03  | OH-                                  | 8.98E-05           | HCOOH                                | 4.00E-03  |
| CO <sub>3</sub> <sup>--</sup>                                                     | 2.46E-04  | CH <sub>3</sub> COOH                 | 3.67E-05           | CACO <sub>3</sub> (AQ)               | 3.50E-03  |
| H <sub>2</sub> (AQ)                                                               | 1.77E-04  | CH <sub>3</sub> CH <sub>2</sub> COO- | 7.38E-07           | CA <sup>++</sup>                     | 6.42E-04  |
| H <sup>+</sup>                                                                    | 1.12E-05  | METHANOL(AQ)                         | 7.20E-07           | CH <sub>4</sub> (AQ)                 | 3.19E-04  |
| CO(AQ)                                                                            | 3.95E-06  | ETHANOL(AQ)                          | 3.00E-07           | H <sub>2</sub> (AQ)                  | 1.77E-04  |
| HCOOH                                                                             | 3.84E-06  | CH <sub>3</sub> COO-                 | 2.24E-07           | CA(OH) <sup>+</sup>                  | 1.31E-04  |
| CH <sub>4</sub> (AQ)                                                              | 1.67E-07  | CO <sub>3</sub> <sup>--</sup>        | 1.45E-07           | CH <sub>3</sub> CH <sub>2</sub> COO- | 1.13E-04  |
| METHANOL(AQ)                                                                      | 5.02E-10  | ETHANE(AQ)                           | 1.17E-07           | H <sup>+</sup>                       | 1.12E-04  |
| CH <sub>3</sub> COO-                                                              | 1.03E-10  | CH <sub>3</sub> CH <sub>2</sub> COOH | 1.06E-07           | CH <sub>3</sub> COOH                 | 3.54E-05  |
| CH <sub>3</sub> COOH                                                              | 1.79E-11  | ETHYLENE(AQ)                         | 4.48E-09           | CH <sub>3</sub> COO-                 | 3.42E-05  |
| CH <sub>3</sub> CH <sub>2</sub> COO-                                              | 1.77E-13  | PROPANE(AQ)                          | 8.26E-11           | METHANOL(AQ)                         | 7.07E-07  |
| ETHANOL(AQ)                                                                       | 1.10E-13  | O <sub>2</sub> (AQ)                  | 1.25E-20           | ETHANOL(AQ)                          | 2.94E-07  |
| ETHANE(AQ)                                                                        | 3.21E-14  | PROPANOL                             | 5.76E-25           | ETHANE(AQ)                           | 1.17E-07  |
| ETHYLENE(AQ)                                                                      | 1.23E-15  |                                      |                    | CH <sub>3</sub> CH <sub>2</sub> COOH | 1.02E-07  |
| CH <sub>3</sub> CH <sub>2</sub> COOH                                              | 2.70E-17  |                                      |                    | ETHYLENE(AQ)                         | 4.48E-09  |
| O <sub>2</sub> (AQ)                                                               | 2.20E-20  |                                      |                    | PROPANE(AQ)                          | 8.26E-11  |
| PROPANE(AQ)                                                                       | 1.20E-20  |                                      |                    | O <sub>2</sub> (AQ)                  | 1.20E-20  |
| PROPANOL                                                                          | 1.107E-34 |                                      |                    | PROPANOL                             | 5.652E-25 |
| <i>abundances among carbon-bearing species</i>                                    |           |                                      |                    |                                      |           |
| % Ca(HCO <sub>3</sub> ) <sup>+</sup>                                              | 74.27     | -                                    | 3.70               |                                      |           |
| % CO <sub>2(AQ)</sub>                                                             | 7.31      | 99.93                                | 91.40              |                                      |           |

**Supplementary Table 4: Conventional thermodynamic modelling of graphite-saturated fluids (C–O–H system) at the investigated experimental conditions.**

|                                                                                    |                                         |
|------------------------------------------------------------------------------------|-----------------------------------------|
| $P$ (GPa), $T$ (° C)                                                               | 3, 700                                  |
| buffer                                                                             | ferrosilite +<br>magnetite +<br>coesite |
| $\log(f_{\text{O}_2}/1 \text{ bar})$ outer capsule <sup>a</sup>                    | -13.21                                  |
| $\log(f_{\text{H}_2}/1 \text{ bar})$ outer capsule =<br>inner capsule <sup>b</sup> | 2.195                                   |
| $\log(f_{\text{O}_2}/1 \text{ bar})$ inner capsule <sup>c</sup>                    | -13.36                                  |
| $X_{\text{CO}_2}$ <sup>c</sup>                                                     | 0.303                                   |
| $\log(f_{\text{O}_2}/1 \text{ bar})^{\text{FMQ,d}}$                                | -13.97                                  |
| $\Delta\text{FMQ}^e$ inner capsule                                                 | +0.61                                   |

<sup>a</sup> $\log(f_{\text{O}_2}/1 \text{ bar})$  of the buffering assemblage  $3 \text{ FeSiO}_3 + 0.5 \text{ O}_2 = \text{Fe}_3\text{O}_4 + 3 \text{ SiO}_2$  (coesite), retrieved using the Perple\_X package and the hp02ver.dat database.

<sup>b</sup> retrieved using the routine "fluids" of the Perple\_X package (H–O HSMRK/MRK hybrid EoS).

<sup>c</sup> retrieved on the basis of constant  $\log(f_{\text{H}_2}/1 \text{ bar})$  using the routine "fluids" of the Perple\_X package (GCOH-fluid MRK).

<sup>d</sup> $\log(f_{\text{O}_2}/1 \text{ bar})$  of the metastable assemblage  $3 \text{ Fe}_2\text{SiO}_4 + \text{O}_2 = 2 \text{ Fe}_3\text{O}_4 + 3 \text{ SiO}_2$  (quartz).

<sup>e</sup>  $\Delta\text{FMQ} = \log(f_{\text{O}_2}/1 \text{ bar})^{\text{sample}} - \log(f_{\text{O}_2}/1 \text{ bar})^{\text{FMQ}}$

**Supplementary Table 5: Nano-SIMS analyses of graphite and aragonite in sample COH92.**

| <b>Filename</b>  | <b><sup>13</sup>C mol%</b> | <b>2 sigma</b> |
|------------------|----------------------------|----------------|
| <i>graphite</i>  |                            |                |
| analysis #1      | 1.119                      | 0.006          |
| analysis #2      | 1.141                      | 0.003          |
| analysis #3      | 1.171                      | 0.003          |
| analysis #4      | 1.181                      | 0.003          |
| <i>aragonite</i> |                            |                |
| analysis #1      | 4.101                      | 0.006          |
| analysis #2      | 8.81                       | 0.04           |
| analysis #3      | 10.12                      | 0.04           |
| analysis #4      | 13.04                      | 0.05           |
| analysis #5      | 20.3                       | 0.2            |
| analysis #6      | 24.0                       | 0.8            |
| analysis #7      | 27.3                       | 0.2            |
| analysis #8      | 28.6                       | 0.3            |
| analysis #9      | 29.1                       | 0.2            |
| analysis #10     | 31                         | 1              |
| analysis #11     | 31.6                       | 0.1            |
| analysis #12     | 32.4                       | 0.7            |
| analysis #13     | 41.4                       | 0.8            |
| analysis #14     | 41.5                       | 0.7            |
| analysis #15     | 84.0                       | 0.8            |

**Supplementary Table 6: LA-ICP-MS analyses of graphite and a**

|                  | <sup>13</sup> C mol% | 2 sigma |
|------------------|----------------------|---------|
| <i>graphite</i>  |                      |         |
| COH106_1         | 1.4                  | 0.2     |
| COH106_2         | 1.5                  | 0.2     |
| COH106_3         | 1.2                  | 0.1     |
| COH98_1          | 1.2                  | 0.1     |
| COH98_2          | 1.1                  | 0.1     |
| COH92_1          | 1.1                  | 0.1     |
| <i>aragonite</i> |                      |         |
| COH106_1         | 65.2                 | 0.7     |
| COH106_2         | 71.5                 | 0.7     |
| COH106_3         | 70.5                 | 0.7     |
| COH106_4         | 67.8                 | 0.7     |
| COH106_5         | 70.6                 | 0.7     |
| COH106_6         | 55.5                 | 0.6     |
| COH106_7         | 58.9                 | 0.6     |
| COH106_8         | 76.9                 | 0.8     |
| COH106_9         | 74.9                 | 0.7     |
| COH106_10        | 76.4                 | 0.8     |
| COH106_11        | 58.8                 | 0.6     |
| COH106_12        | 59.0                 | 0.6     |
| COH106_13        | 81.6                 | 0.8     |
| COH106_14        | 71.6                 | 0.7     |
| COH106_15        | 71.9                 | 0.7     |
| COH98_1          | 45.5                 | 0.5     |
| COH98_2          | 45.3                 | 0.5     |
| COH98_3          | 46.2                 | 0.5     |
| COH98_4          | 47.0                 | 0.5     |
| COH92_1          | 36.2                 | 0.4     |
| COH92_2          | 27.6                 | 0.3     |
| COH92_3          | 38.7                 | 0.4     |
| COH92_4          | 38.6                 | 0.4     |
| COH92_5          | 42.0                 | 0.4     |
| COH92_6          | 37.9                 | 0.4     |
| COH92_7          | 38.4                 | 0.4     |
| COH92_8          | 43.7                 | 0.4     |
| COH92_9          | 49.8                 | 0.5     |
| COH92_10         | 41.0                 | 0.4     |
| COH92_11         | 45.9                 | 0.5     |
| COH97_1          | 36.5                 | 0.4     |
| COH97_2          | 98                   | 1       |
| COH97_3          | 88.9                 | 0.9     |
| COH97_4          | 55.4                 | 0.6     |
| COH97_5          | 38.0                 | 0.4     |
| COH97_6          | 73.7                 | 0.7     |
| COH97_7          | 60.5                 | 0.6     |
| COH97_8          | 53.1                 | 0.5     |
| COH97_9          | 52.2                 | 0.5     |
| COH97_10         | 57.2                 | 0.6     |
| COH97_11         | 63.0                 | 0.6     |

**Supplementary Table 7: Parameters of Equation 6.**

| <b>Independent variable</b>            | <b>Parameter estimate</b> | <b>sigma</b> |
|----------------------------------------|---------------------------|--------------|
| 1                                      | 4.71676                   | 0.0507989    |
| WAR                                    | -2.87021                  | 0.0494956    |
| $\Delta\text{FMQ}$                     | -3.00212                  | 0.163084     |
| $\Delta\text{FMQ}^2$                   | 2.15874                   | 0.238246     |
| $\Delta\text{FMQ}^3$                   | -2.08921                  | 0.118716     |
| $\Delta\text{FMQ} \times \text{WAR}$   | 0.294843                  | 0.0586424    |
| $\text{WAR}^2$                         | 1.02176                   | 0.0267483    |
| $\text{WAR}^3$                         | -0.12774                  | 0.00443806   |
| $\Delta\text{FMQ}^2 \times \text{WAR}$ | -1.02538                  | 0.0513343    |
| $\text{WAR}^{-2}$                      | 0.0030557                 | 0.00010255   |

WAR=water/aragonite molar ratio.

$$\Delta\text{FMQ} = \log(f\text{O}_2/1\text{ bar})^{\text{sample}} - \log(f\text{O}_2/1\text{ bar})^{\text{FMQ}}$$

**Supplementary Table 8: Thermal decomposition of oxalic acid di-hydrate and retrieval of the mass-bias QMS correction factor.**

|                             | <sup>12</sup> C-OAD mg | <sup>13</sup> C-OAD mg | predicted <sup>13</sup> C/ <sup>12</sup> C | predicted <sup>13</sup> C abundance mol% | integrated peak channel 44 | integrated peak channel 45 | ratio 45/44 | ratio 45 <sub>corr</sub> <sup>a</sup> /44 | <sup>13</sup> C abundance % |
|-----------------------------|------------------------|------------------------|--------------------------------------------|------------------------------------------|----------------------------|----------------------------|-------------|-------------------------------------------|-----------------------------|
| regular OAD                 | 3.6                    | 0                      | 0.013                                      | 1.25                                     | 5.53E-06                   | 7.02E-08                   | 0.013       | -                                         | 1.29                        |
| labeled <sup>13</sup> C-OAD | 0                      | 9.91                   | 191.283                                    | 99.5                                     | 2.86E-07                   | 5.47E-05                   | 191.283     | -                                         | 99.5                        |
| mix 1                       | 5.55                   | 5.11                   | 0.922                                      | 48.0                                     | 7.45E-06                   | 6.38E-06                   | 0.856       | 0.881                                     | 46.9                        |
| mix 2                       | 7.52                   | 1.53                   | 0.214                                      | 17.6                                     | 8.79E-06                   | 2.40E-06                   | 0.273       | 0.281                                     | 22.0                        |
| mix 3                       | 0.72                   | 9.06                   | 11.729                                     | 92.1                                     | 3.92E-06                   | 4.45E-05                   | 11.364      | 11.705                                    | 92.1                        |
| test_AA8                    | 0.56                   | 0.86                   | 1.52                                       | 60.4                                     | 0.00                       | 0.00                       | 1.35        | 1.39                                      | 58.1                        |

OAD: oxalic acid di-hydrate

a: using correction factor 1.03 for channel 45, corresponding to a regression line through mix1–mix2–mix3 with  $R^2=0.99993$

**Supplementary Table 9: LA-ICP-MS of standard carbonates.**

|                          | <sup>13</sup> C mol% | 2 sigma |
|--------------------------|----------------------|---------|
| <i>natural calcite</i>   |                      |         |
| natural_calcite_1        | 1.07                 | 0.05    |
| natural_calcite_2        | 1.09                 | 0.05    |
| natural_calcite_3        | 1.15                 | 0.06    |
| natural_calcite_4        | 1.12                 | 0.06    |
| natural_calcite_5        | 1.10                 | 0.05    |
| <i>synthetic calcite</i> |                      |         |
| synthetitc_calcite_1     | 43.9                 | 0.4     |
| synthetitc_calcite_2     | 43.7                 | 0.4     |
| synthetitc_calcite_3     | 44.4                 | 0.4     |

synthetic calcite is precipitated from mixed <sup>12</sup>C–<sup>13</sup>C Na<sub>2</sub>CO<sub>3</sub> solutions.

**Supplementary Table 10: Bulk analyses of labelled reagent and standard carbonates.**

|                                                                    | integrated peak<br>channel 44 | integrated peak<br>channel 45 | ratio 45/44 | ratio 45 <sub>corr</sub> <sup>a</sup> /44 | <sup>13</sup> C abundance mol% |
|--------------------------------------------------------------------|-------------------------------|-------------------------------|-------------|-------------------------------------------|--------------------------------|
| synthetic <sup>13</sup> C calcite                                  | 6.83E-08                      | 1.18E-05                      | 173         | 178                                       | 99.4                           |
| precipitated ( <sup>12</sup> C, <sup>13</sup> C) synthetic calcite | 4.45E-06                      | 3.36E-06                      | 0.755       | 0.778                                     | 43.8                           |
| natural-abundance calcite                                          | 5.62E-06                      | 6.22E-08                      | 0.0111      | 0.0114                                    | 1.13                           |

a: using correction factor 1.03 for the integrated peak of channel 45.
